# Supplementary material for: Rolling-induced Face Centered Cubic Titanium in Hexagonal Close Packed Titanium at Room Temperature
Source: PubMed Central journal article supplement (PMC4828854; doi:10.1038/srep24370), 2016-04-12
Supplement: srep24370-s1.pdf [file srep24370-s1.pdf]

## Supplementary Information

### Rolling-induced Face Centered Cubic Titanium in Hexagonal Close Packed Titanium at Room Temperature

H. C. Wu<sup>1,a</sup>, A. Kumar<sup>2,a</sup>, J. Wang<sup>3,\*</sup>, X. F. Bi<sup>1,\*</sup>, C. N. Tomé<sup>2</sup>, Z. Zhang<sup>4</sup> and S.X. Mao<sup>5,\*</sup>

<sup>1</sup>School of Materials Science and Engineering, Beihang University, Beijing 100191, People's Republic of China

<sup>2</sup>Materials Science and Technology Division, Los Alamos National Laboratory, Los Alamos, NM 87545, USA

<sup>3</sup>Mechanical and Materials Engineering, University of Nebraska-Lincoln, Lincoln, NE 68588, USA

<sup>4</sup>Department of Materials Science, State Key Lab of Si Materials, ZheJiang University, Hangzhou, Zhejiang, China

<sup>5</sup>Department of Mechanical Engineering and Materials Science, University of Pittsburgh, Pittsburgh, Pennsylvania 15261, USA

<sup>a</sup>These authors contributed equally to this work.

\*Corresponding authors: [sxm2@pitt.edu](mailto:sxm2@pitt.edu) (SXM); [bixf@buaa.edu.cn](mailto:bixf@buaa.edu.cn) (XFB); [jianwang@unl.edu](mailto:jianwang@unl.edu) (JW)

Figure S1. Structural characterization of fcc-Ti.

Figures S2 to S5. Topological Analysis.

Figure S6. Original images of Cs-corrected HRTEM.

Figure S7. Magnified images of the stable hcp/fcc interface.

---

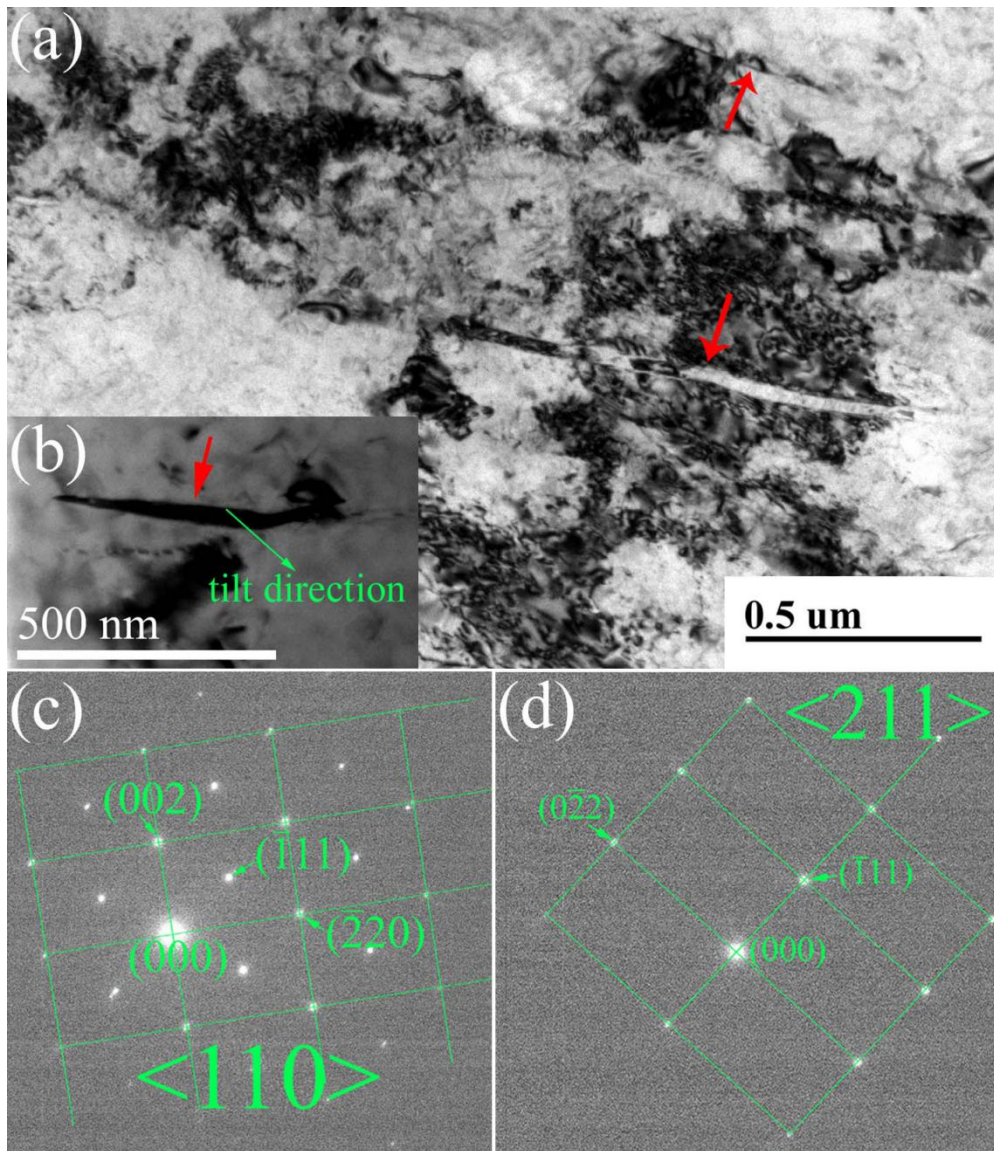

**Figure S1.** Structural characterization of fcc-Ti: (a) Platelet bands indicated by red arrows in hcp-Ti. (b) A magnified image of a platelet band. (c) SAED patterns of the band in (b) along a certain zone axis, which matches with fcc  $\langle 110 \rangle$ . (d) SAED patterns of the band in (b) along a certain zone axis, which matches with fcc  $\langle 112 \rangle$ . The tilt angle between the two observed directions (b and c) is  $29^\circ$ , close to the ideal tilt angle  $30^\circ$  in an fcc structure.

## Topological Analysis of nucleation of fcc-Ti band in hcp matrix

Figures S2-S5 show coherent dichromatic complex of hcp-Ti (red symbols) and fcc-Ti (black symbols) where the two crystals retain coherency in the x- and z- axis and adopt the orientation relation designated as the x-axis along the  $\langle 1\bar{2}10 \rangle_{\text{hcp}}$  and  $\langle 1\bar{1}0 \rangle_{\text{fcc}}$ , the y-axis along  $\langle 10\bar{1}0 \rangle_{\text{hcp}}$  and  $\langle 110 \rangle_{\text{fcc}}$ , and the z-axis along  $\langle 0001 \rangle_{\text{hcp}}$  and  $\langle 001 \rangle_{\text{fcc}}$ , respectively. Circle and triangle symbols represent atomic planes along the z-axis. The x-axis is the horizontal axis, the y-axis is the vertical axis, and the z-axis is pointing out the paper.

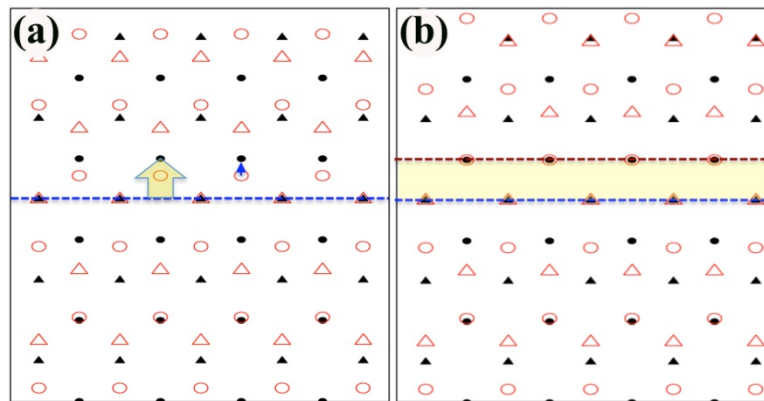

**Figure S2.** Nucleation of a one-layer fcc-Ti via pure shuffle mechanism. (a) Atoms movement mode, which only involves a small shuffle displacement. (b) A one-layer fcc-Ti nucleus in hcp-Ti matrix and two phase boundaries indicated by dashed lines. the arrow indicates the growth direction.

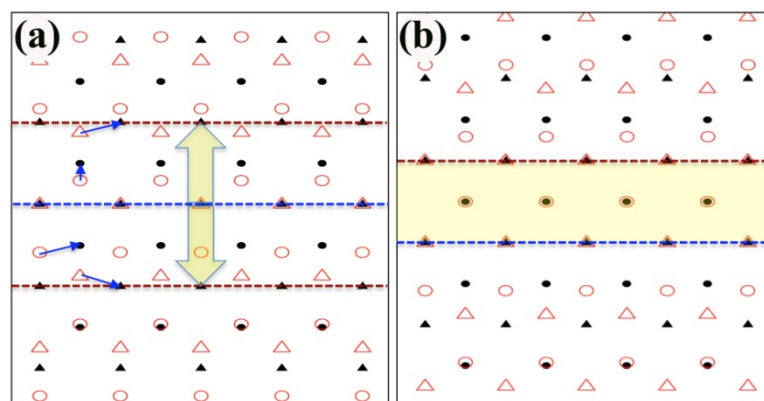

**Figure S3.** Nucleation of a two-layer fcc-Ti band via shear-shuffle mechanism. (a) Atoms movement mode, which involves both shuffle and shear components. (b) A two-layer fcc-Ti nucleus in hcp matrix and the two phase boundaries are of different type.

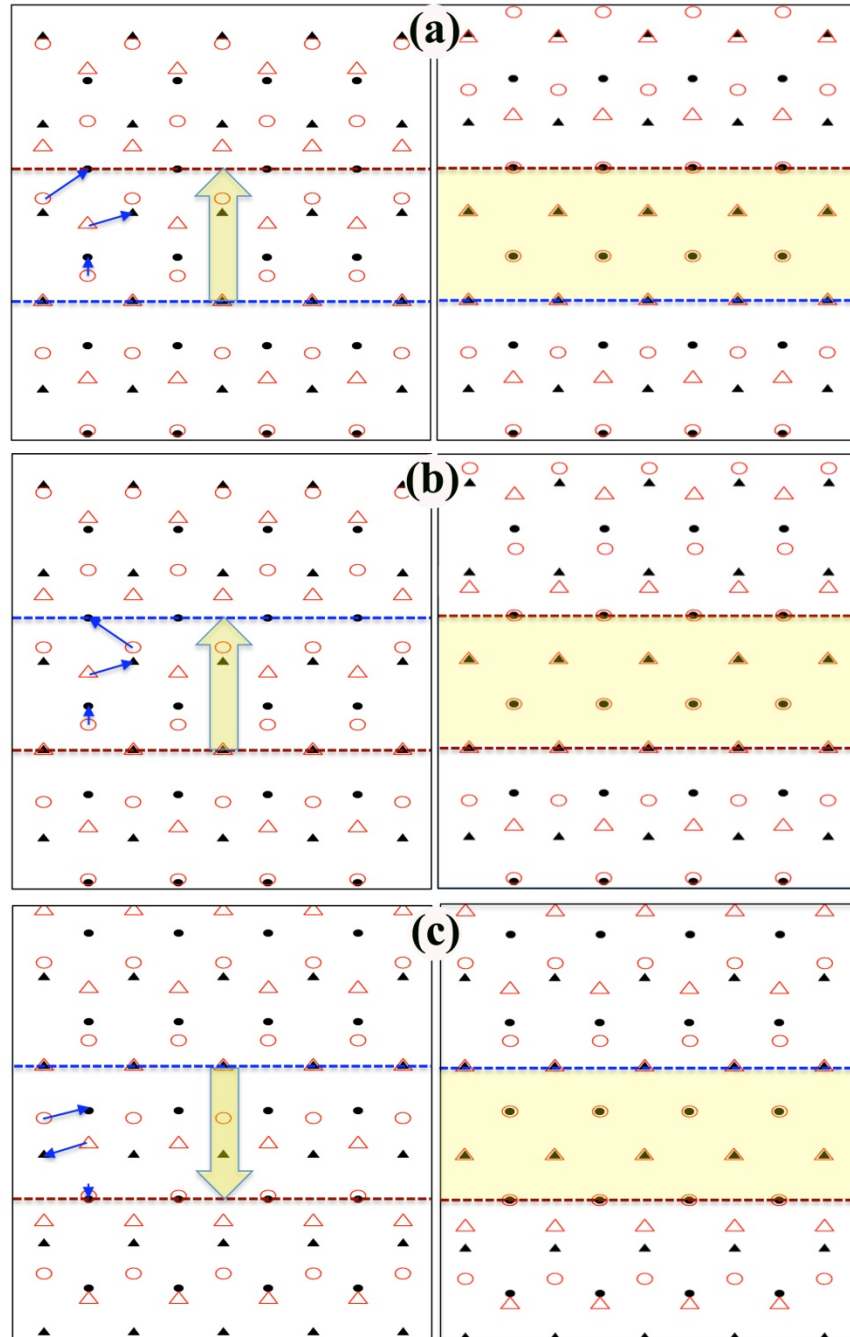

**Figure S4.** Nucleation of a three-layer fcc-Ti band via different mechanisms. (a) Shear-shuffle mechanism, forming two identical phase boundaries. (b) Shear-shuffle mechanism, and the two phase boundaries are of different type. (c) Pure-shuffle mechanism, via which two identical phase boundaries differing from that shown in (a) form.

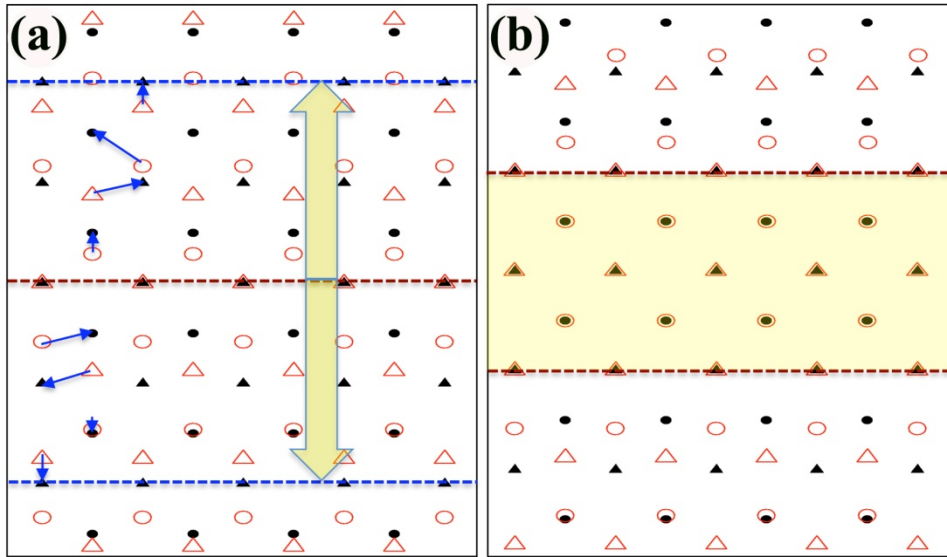

**Figure S5.** Nucleation of a four-layer fcc-Ti band via pure shuffle mechanism. (a) Atoms movement mode, either upward or downward is an effective approach. (b) A four-layer fcc-Ti in hcp matrix, and the two phase boundaries are of different type.

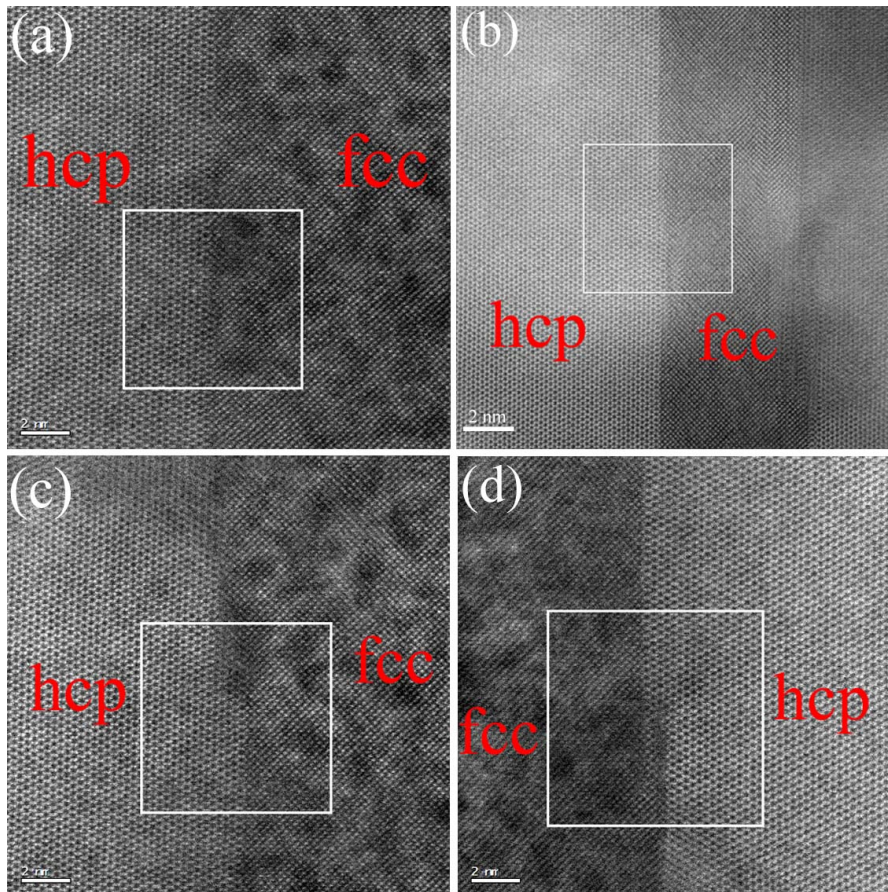

**Figure S6.** Cs-corrected HRTEM of  $\{10\bar{1}0\}_{\text{hcp}}\|\{110\}_{\text{fcc}}$  interfaces, (a) A two-layer step, (b) a four-layer step, (c) a six-layer step, and (d) an eight-layer step. The region outlined by the white box is corresponding to Fig. 4a-d in the text.

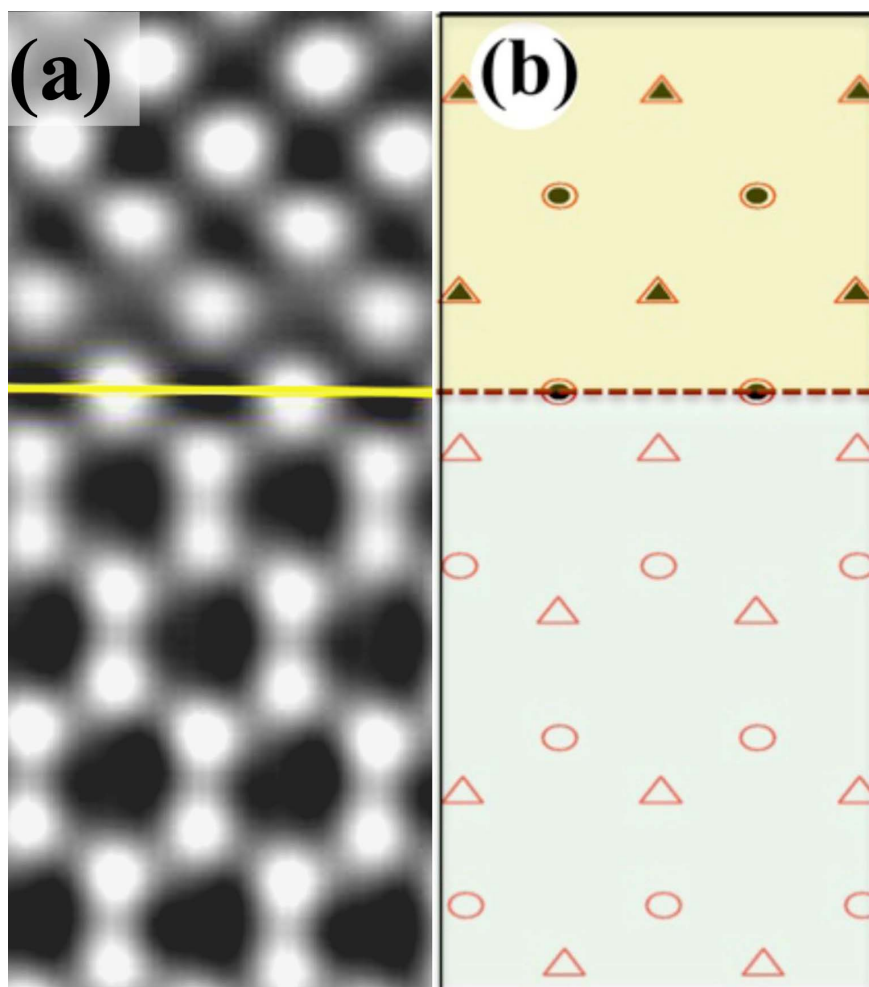

**Figure S7.** HRTEM analysis confirms the prediction of the stable phase interface. The yellow line in (a) is same as the brown dashed line in (b), indicating the shared atomic plane.
